# Supplementary material for: Tunable quantum beam splitters for coherent manipulation of a solid-state tripartite qubit system
Source: PubMed Central journal article supplement — Nat Commun. 2010 Aug;1(5):1–7. doi: 10.1038/ncomms1050 (PMC2982164; doi:10.1038/ncomms1050), 2010-08
Supplement: ncomms1050-s1.pdf [file ncomms1050-s1.pdf]

## **Supplementary Information for**

Tunable Quantum Beam Splitters for Coherent Manipulation of a Solid-State  
Tripartite Qubit System

Guozhu Sun<sup>1,2,3\*</sup>, Xueda Wen<sup>3</sup>, Bo Mao<sup>2</sup>, Jian Chen<sup>1</sup>, Yang Yu<sup>3\*</sup>,  
Peiheng Wu<sup>1</sup>, Siyuan Han<sup>2\*</sup>

<sup>1</sup>Research Institute of Superconductor Electronics, School of Electronic  
Science and Engineering, Nanjing University, Nanjing 210093, China

<sup>2</sup>Department of Physics and Astronomy, University of Kansas, Lawrence,  
KS 66045, USA

<sup>3</sup>National Laboratory of Solid State Microstructures, School of Physics,  
Nanjing University, Nanjing 210093, China

\*To whom correspondence should be addressed. E-mail:  
gzsun@nju.edu.cn; yuyang@nju.edu.cn; han@ku.edu.

**Supplementary Figures (Fig. S1, Fig. S2 and Fig. S3)**

## Supplementary Figures

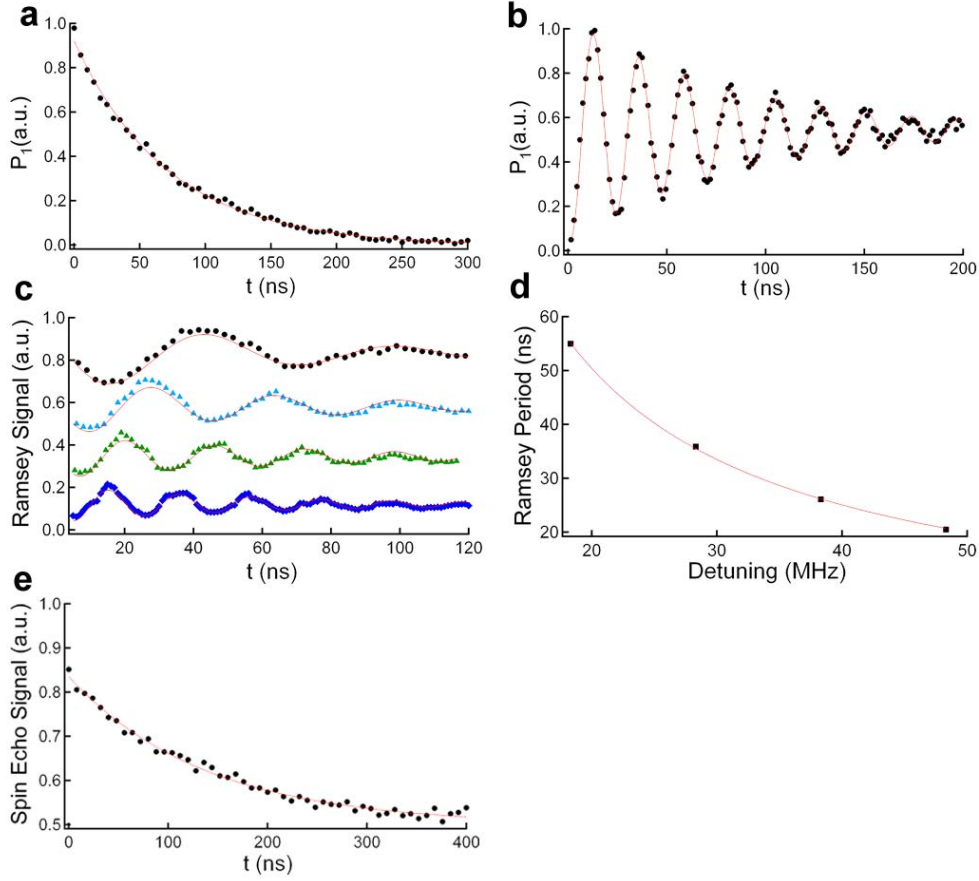

Fig. S1 **Dynamics in the region free of qubit-TLS coupling.** **a**, Energy decay from the excited state to the ground state.  $T_1 \simeq 70$  ns. **b**, Rabi oscillation.  $T_R \simeq 80$  ns. **c**, Ramsey fringes with different microwave power. Curves are shifted vertically for clarity. **d**, Ramsey fringes period vs detuning frequency.  $T_2^* \simeq 60$  ns. **e**, Spin-echo signal.  $T_2 \simeq 137$  ns. The symbols are the experimental data and the solid lines are theoretical fittings.

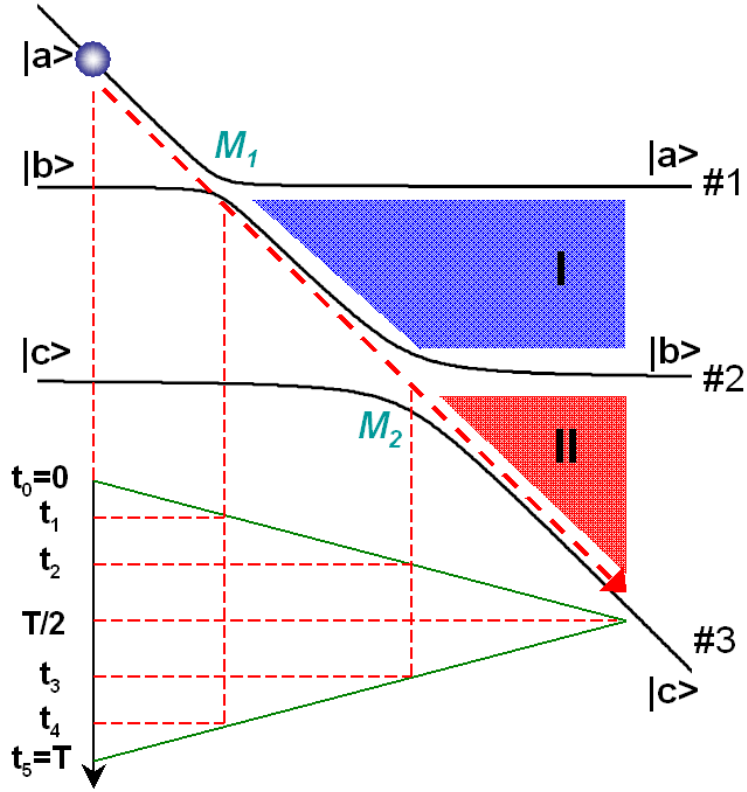

Fig. S2 Schematic of generating LZS interference with tunable beam splitters in a phase qubit coupled to two TLSs.  $|a\rangle$ ,  $|b\rangle$  and  $|c\rangle$  are the instantaneous eigenstates of the time-dependent Hamiltonian (14).

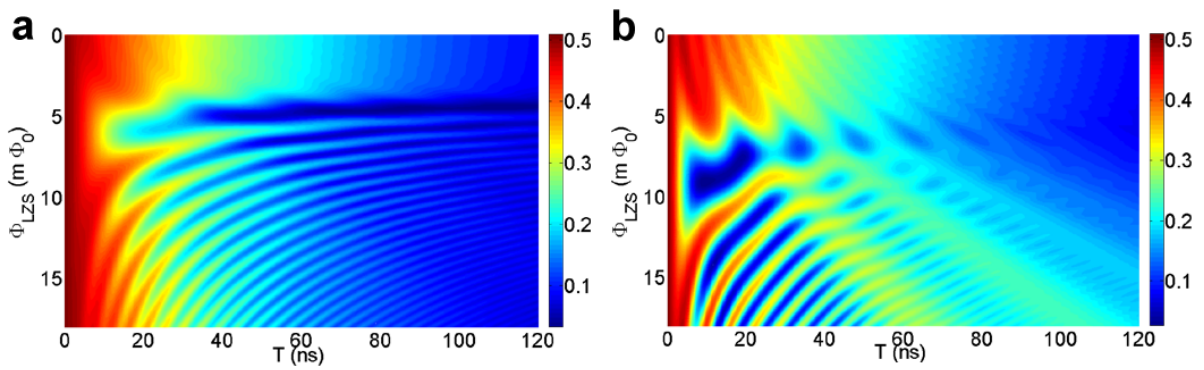

Fig. S3 LZS interference in qubit-TLS system. **a**, Numerically simulated LZS interference pattern in the qubit-first TLS system. **b**, Numerically simulated LZS interference pattern in the qubit- second TLS system.
